# Supplementary material for: A promising solution to the limits of microscopes for smooth surfaces: fluorophore-aided scattering microscopy
Source: Royal Society of Chemistry journal article supplement (doi:10.1039/c8nr00731d), 2018-01-01
Supplement: c8nr00731d1.pdf [file c8nr00731d1.pdf]

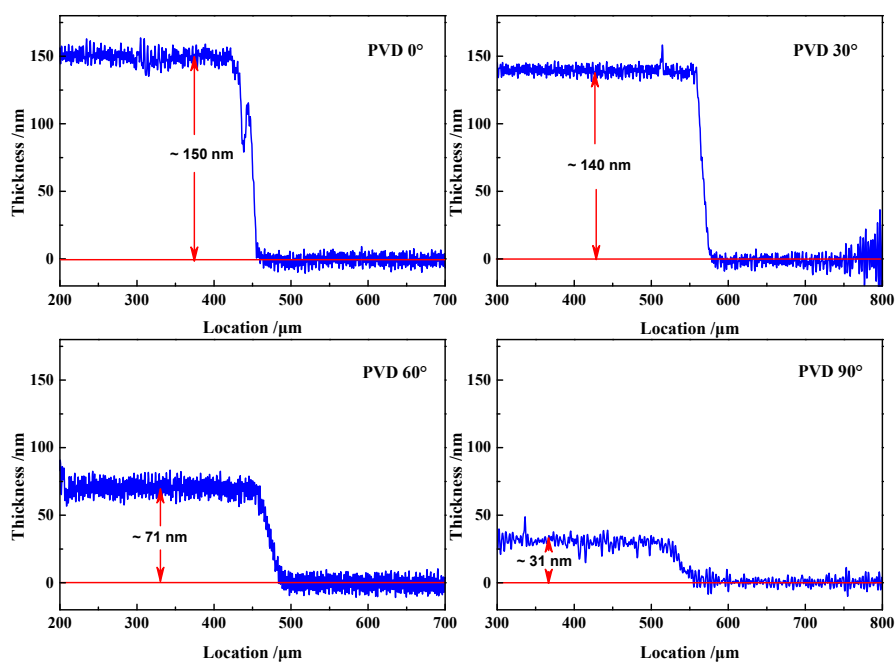

Figure S1 Thickness variation caused by deposition angle of the sample prepared through PVD

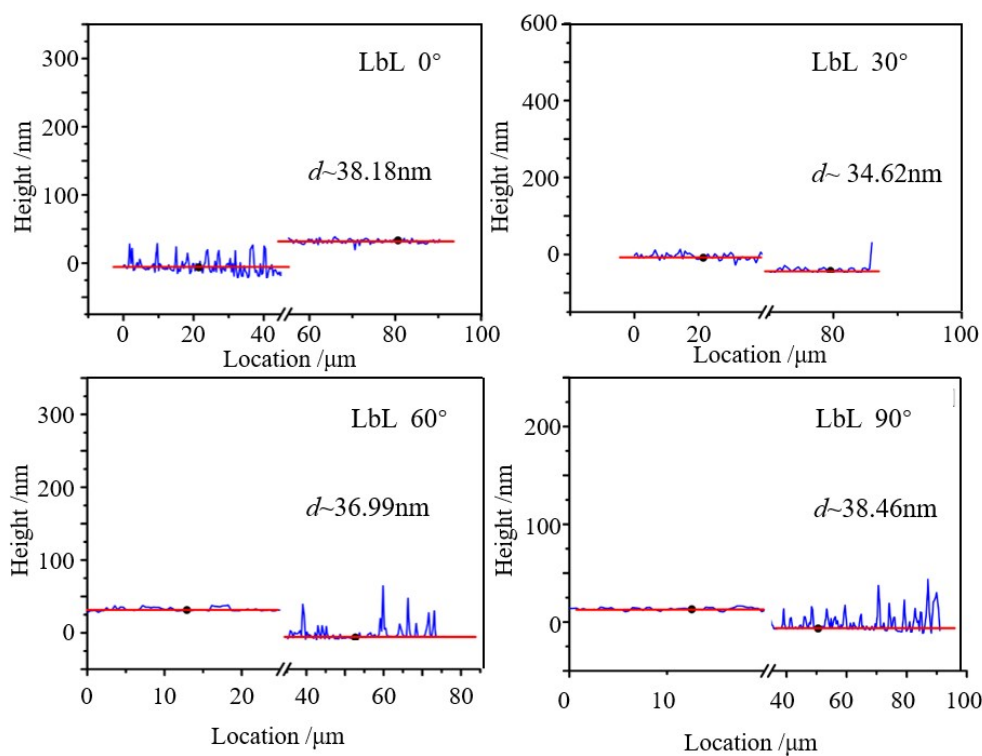

Figure S2 Thickness variation caused by deposition angle of the sample prepared through LbL
